# Supplementary material for: Structure and mechanistic features of the prokaryotic minimal RNase P
Source: eLife journal article supplement (doi:10.7554/elife.70160), 2021-06-28
Supplement: fig1-figsupp1-data1 [file Figure 1-figure supplement 1-source data 1.docx]

**Figure S1 -source data 1**

**SDS-PAGES and Western blot from the purification of Hhal2243.**

This zip archive contains the raw SDS-PAGEs and a western blot shown in figure S1 with and without the respective label as indicated by “raw” and “labeled” in the file name.
