# Supplementary material for: Structure and mechanistic features of the prokaryotic minimal RNase P
Source: eLife journal article supplement (doi:10.7554/elife.70160), 2021-06-28
Supplement: fig1-figsupp2-data1 [file Figure 1-figure supplement 2-source data 1.docx]

**Figure S2 -source data 1**

**RNase P processing of 5'-32P-labeled *T. thermophilus* pre-tRNAGly by Aq880 and Hhal2243**

This zip archive contains the raw phosphor images shown in figure S2 with and without the respective label as indicated by “raw” and “labeled” in the file name.
