# Supplementary material for: Structure and mechanistic features of the prokaryotic minimal RNase P
Source: eLife journal article supplement (doi:10.7554/elife.70160), 2021-06-28
Supplement: fig2-data1 [file Figure 2-source data 1.docx]

**Figure 2 -source data 1**

**Processing of pre-tRNAGly by Aq880 wt and derived truncated mutant variants.**

This zip archive contains the raw phosphor images shown in figure 2 with and without the respective label as indicated by “raw” and “labeled” in the file name.
